# Supplementary material
Source: PubMed Central journal article supplement (PMC3149880)
Supplement: nucl0203_0195SD3.pdf [file nucl0203_0195SD3.pdf]

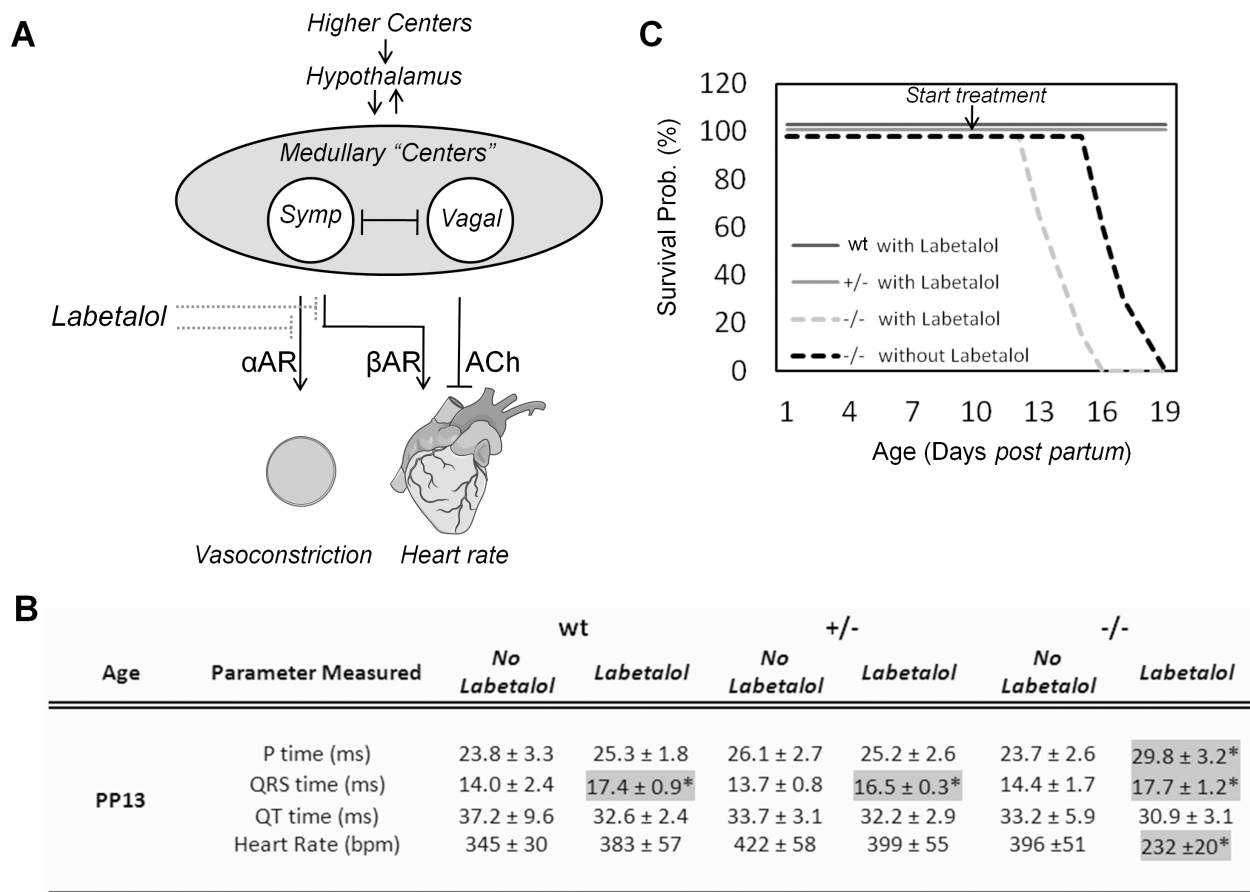

**Figure S1. Cardiac effects of  $\alpha$ - and  $\beta$ -adrenergic receptor antagonist treatment in  $LMNA^{GT}$  mice. (A)** Labetalol inhibits sympathetic activity by antagonizing  $\alpha$ - and  $\beta$ -adrenergic receptors, thereby suppressing sympathetic stimulation of heart rate and vasoconstriction. Arrows and T-shaped ends indicate respectively stimulatory and inhibitory actions. **(B)** ECG analysis indicating heart rate, P time, QRS duration and QT time at the age of PP13, 3 days after the start (PP10) of subcutaneous labetalol or control injections in all genotypes (See Materials & Methods). Asterisks in this figure indicate significant ( $P < 0.05$ ;  $N = 5$ ) differences between labetalol and control injections within the same genotype. **(C)** Survival curve for  $LMNA^{GT/-}$  mice treated from PP10 onward with labetalol or control injections (dashed lines) versus survival curves for labetalol treated  $LMNA^{GT+/-}$  and WT siblings (straight lines) ( $N = 5$  each condition).

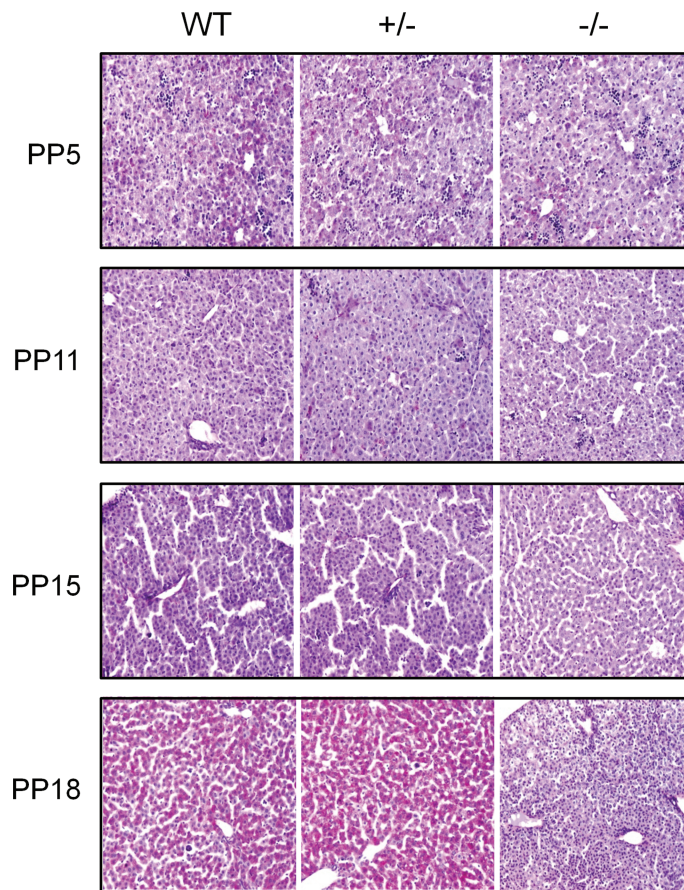

**Figure S2. Post-natal hepatic glycogen storage in  $LMNA^{GT-/-}$  mice.** Formalin fixed liver sections were Periodic Acid Schiff (PAS) stained to visualize glycogen deposits in a light purple/pink color.  $LMNA^{GT-/-}$  mice show absence of glycogen deposits at all ages investigated, whereas in WT and  $LMNA^{GT+/-}$  livers glycogen is detectable at day PP18.

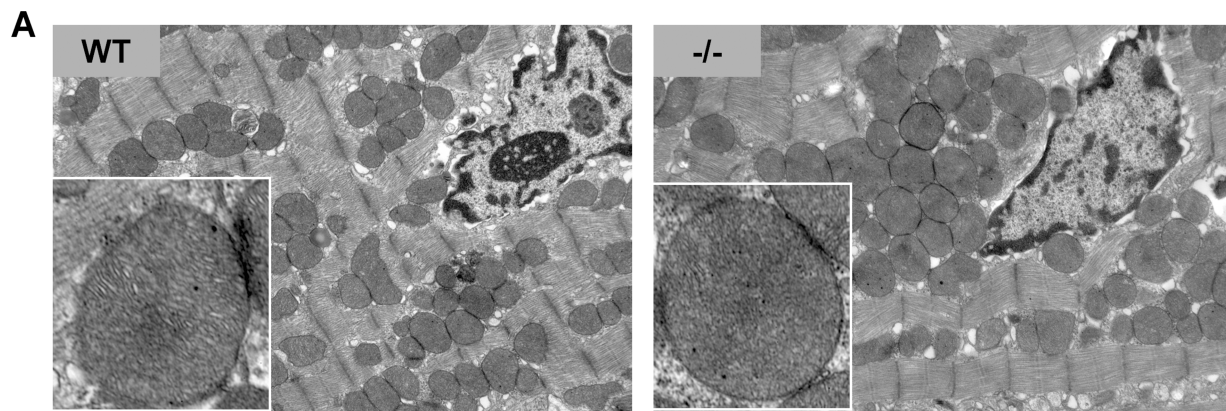

**B**

| Age                                   | Parameter Measured                     | N= | wt            | -/-             |
|---------------------------------------|----------------------------------------|----|---------------|-----------------|
| <u>Mitochondrial DNA copy number:</u> |                                        |    |               |                 |
|                                       | Heart Left Ventricle                   | 4  | 6.93 ± 2.18   | 8.38 ± 2.36     |
|                                       | Skeletal Muscle                        | 4  | 4.08 ± 1.24   | 4.18 ± 0.42     |
| PP15                                  | <u>Mitochondrial Complex Activity:</u> |    |               |                 |
|                                       | Citrate Synthase (CS)                  | 5  | 1508 ± 118    | 1712 ± 307*     |
|                                       | Complex I/CS                           | 5  | 0.182 ± 0.013 | 0.178 ± 0.011   |
|                                       | Complex II/CS                          | 5  | 0.122 ± 0.007 | 0.114 ± 0.0024* |
|                                       | Complex III/CS                         | 5  | 0.406 ± 0.046 | 0.345 ± 0.122   |
|                                       | Complex IV/CS                          | 5  | 0.408 ± 0.05  | 0.372 ± 0.06    |
|                                       | Complex V/CS                           | 5  | 0.461 ± 0.028 | 0.525 ± 0.061   |

**Figure S3. Mitochondrial morphology and functioning in  $LMNA^{GT-/-}$  mice.** (A) Transmission Electron Microscopy pictures of left ventricle cardiac tissue at day PP15 WT and  $LMNA^{GT-/-}$  mice, showing cardiac muscle fiber and Z-disc orientation, and (in close-up) a typical example of a mitochondrion. (B) Mitochondrial DNA copy numbers (N=4) and complex activities (N=5) in both quadriceps skeletal and cardiac muscle as determined at PP15 (See material and methods). Asterisks indicate significant differences for WT and  $LMNA^{GT-/-}$  values (P < 0.05).
